# Supplementary material for: Solvothermal synthesis of Nb-doped TiO2 nanoparticles with enhanced sonodynamic effects for destroying tumors
Source: Royal Society of Chemistry journal article supplement (doi:10.1039/d1ra06548c), 2021-01-01
Supplement: d1ra06548c1.pdf [file d1ra06548c1.pdf]

## Electronic Supplementary Information

### **Solvothermal synthesis of Nb-doped TiO<sub>2</sub> nanoparticles with enhanced sonodynamic effect for destroying tumors**

Wenjie Sun<sup>1a\*</sup>, Xiaojuan Dong<sup>1b</sup>, Pingping Huang<sup>a</sup>, Jia Shan<sup>a</sup>, Lei Qi<sup>a</sup>, Jun Zhou<sup>c\*</sup>

<sup>a</sup> State Key Laboratory of Ophthalmology, Optometry and Visual Science, Institute of Advanced Materials for Nano-Bio Applications, School of Ophthalmology and Optometry, School of Biomedical Engineering, Wenzhou Medical University, Wenzhou, 325035, China. Email: sunwj611@hotmail.com

<sup>b</sup> Center for Reproductive Medicine, Naval Medical Center of PLA, Second Military Medical University, Shanghai 200052, China. Email: dxj\_doctor@126.com

<sup>c</sup> Shanghai Xuhui Central Hospital, Zhongshan-Xuhui Hospital, Fudan University, Shanghai 200031, China. dr\_zhoujun@163.com

Correspondence: sunwj611@hotmail.com (W. Sun); dr\_zhoujun@163.com (J. Zhou)

## Supplementary figures

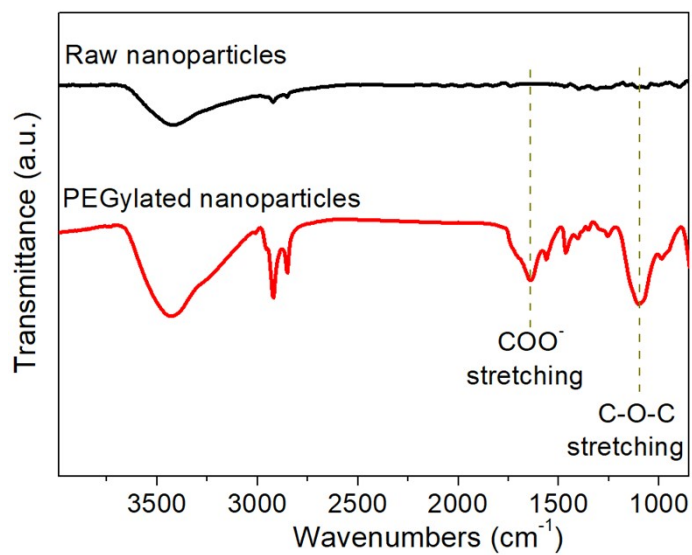

**Fig. S1** FTIR spectra of raw and PEGylated nanoparticles.

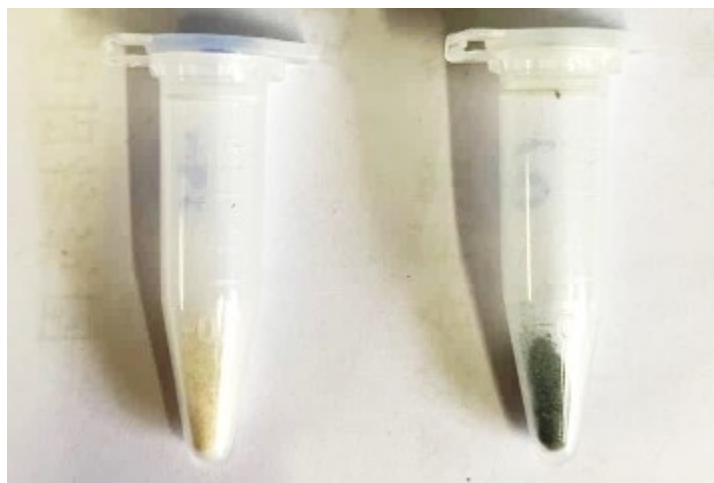

**Fig. S2** The photograph of pure TiO<sub>2</sub> sample (Left) and TiO<sub>2-x</sub>:Nb sample (Right).

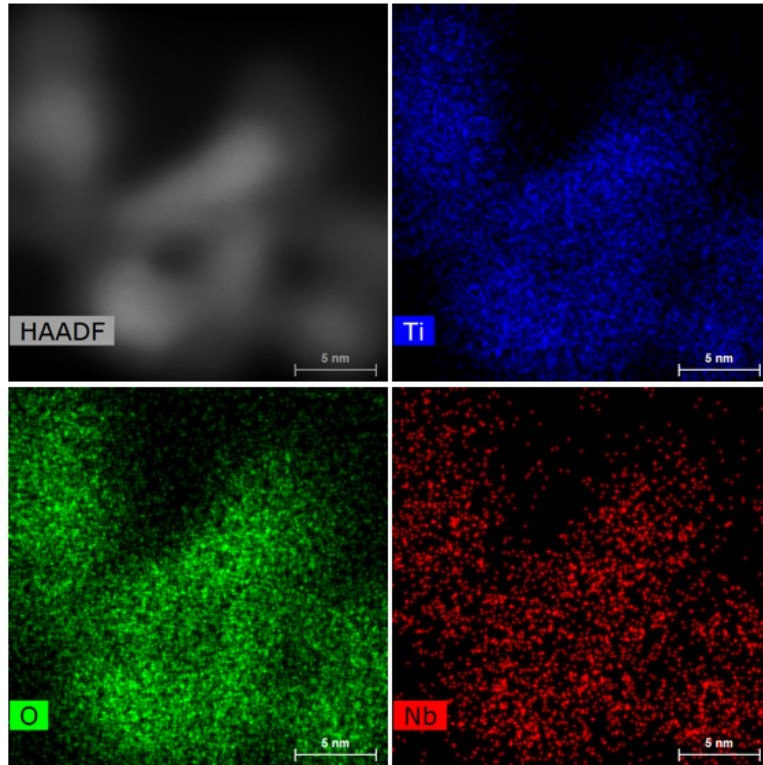

**Fig. S3** The elemental maps of  $\text{TiO}_{2-x}\text{:Nb}$  nanoparticles.

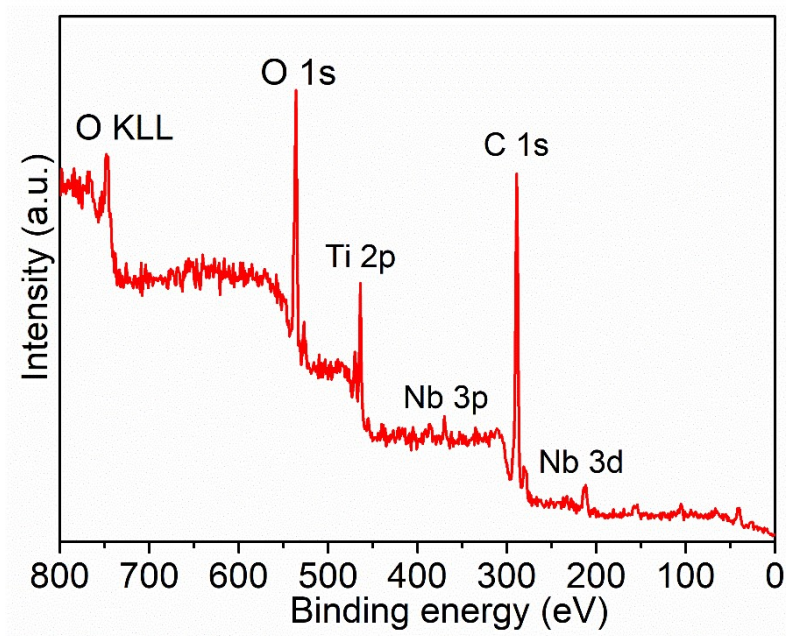

**Fig. S4** The XPS survey spectrum of  $\text{TiO}_{2-x}\text{:Nb}$  samples.

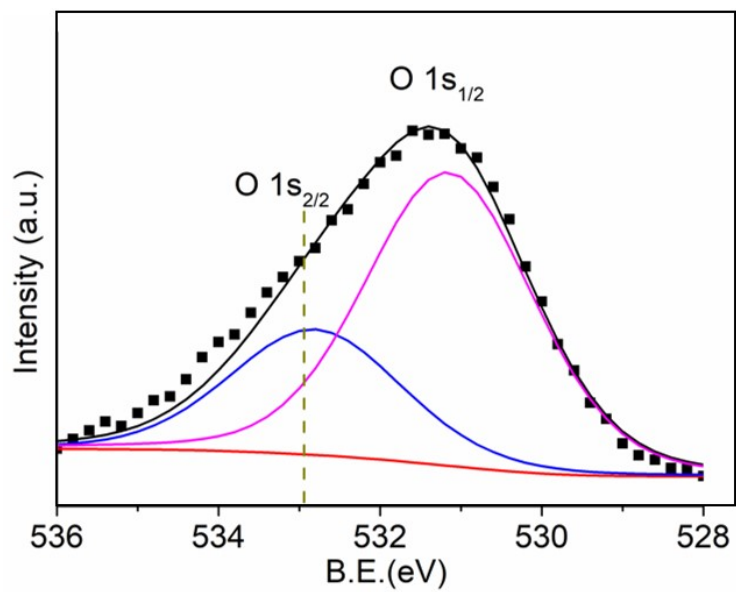

**Fig. S5** The O 1s XPS spectrum of TiO<sub>2-x</sub>:Nb samples.

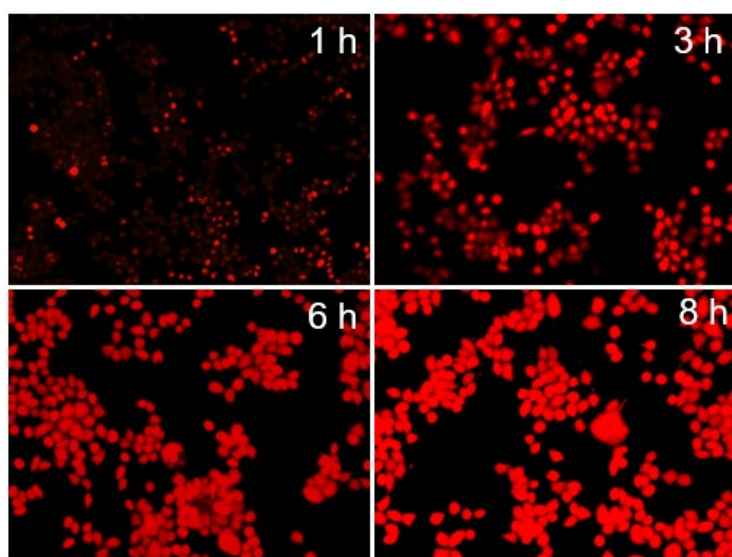

**Fig. S6** Fluorescent images of 4T1 cells incubated with RhB-labeled nanoparticles for different incubation time of 1, 3, 6, and 8 h.

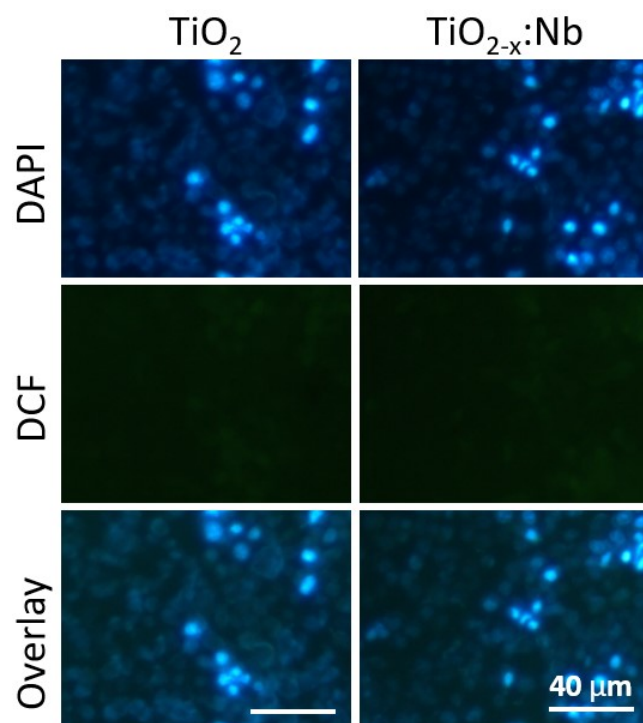

**Fig. S7** The fluorescence images of DCF/DAPI stained 4T1 cells treated with PEGylated  $\text{TiO}_2$  or  $\text{TiO}_{2-x}\text{:Nb}$  (40 ppm).
